# Supplementary material
Source: PubMed Central journal article supplement (PMC8034218)
Supplement: jcsm.8686.ds001.pdf [file jcsm.8686.ds001.pdf]

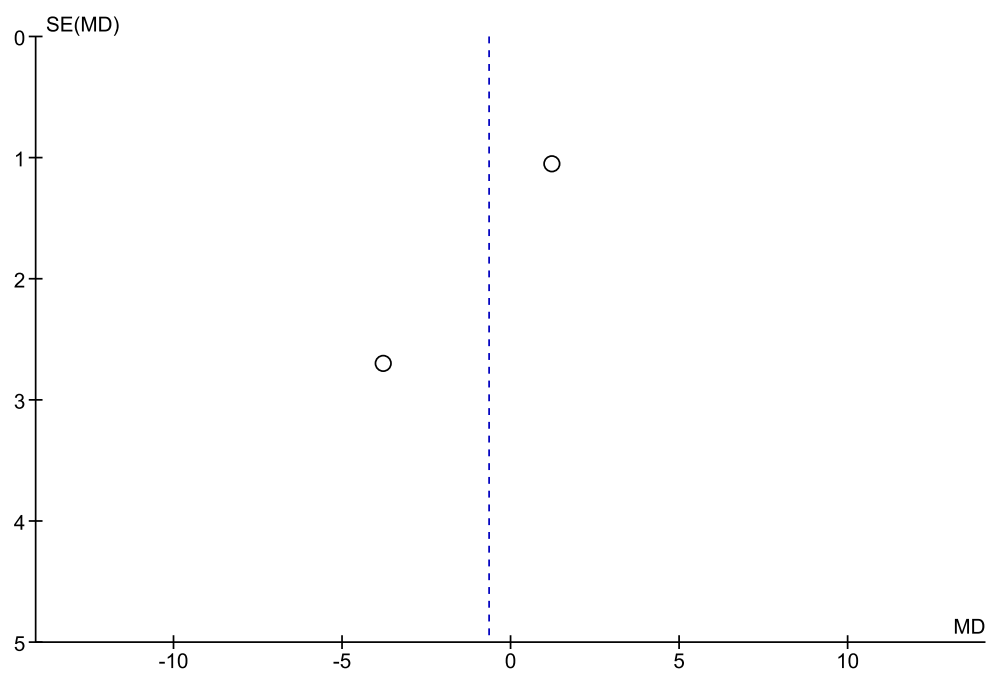

Figure S1: Funnel plot for mean  $\text{VO}_2$  max in  $\text{mL}\cdot\text{kg}^{-1}\cdot\text{min}^{-1}$  pre and post CPAP treatment in OSA patients. MD: mean difference; SE: standard error.

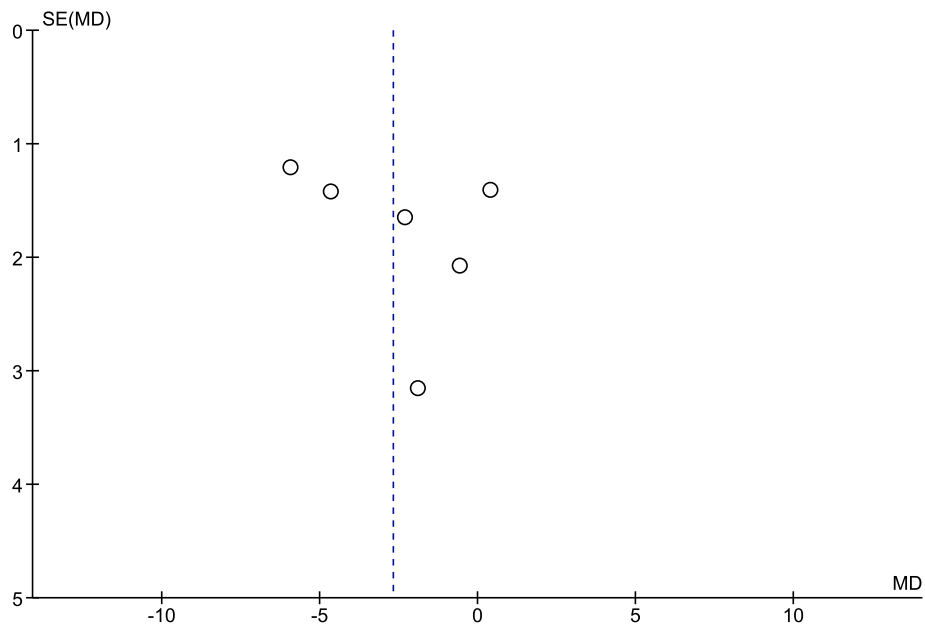

Figure S2: Funnel plot for mean  $\text{VO}_2$  peak in  $\text{mL}\cdot\text{kg}^{-1}\cdot\text{min}^{-1}$  pre and post CPAP treatment in OSA patients. MD: mean difference; SE: standard error.

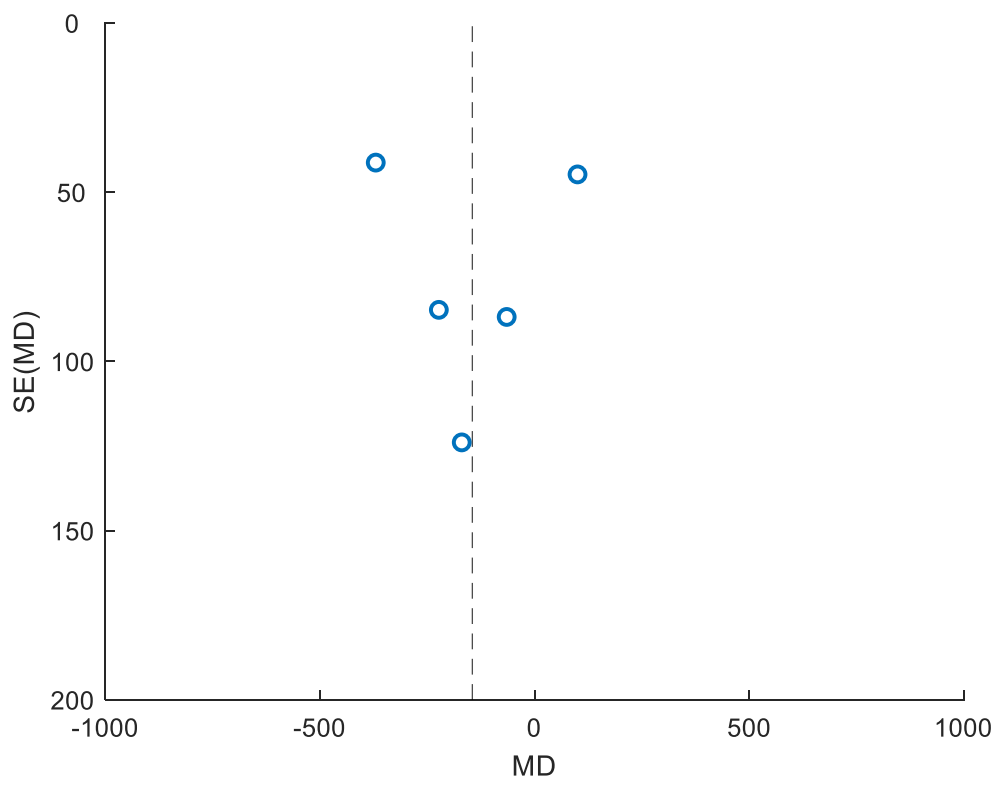

Figure S3: Funnel plot for mean AT in  $\text{mL} \cdot \text{min}^{-1}$  pre and post CPAP treatment in OSA
